# Supplementary material for: Selectivity Studies and Free Energy Calculations of AKT Inhibitors
Source: MDPI journal article supplement (doi:10.3390/molecules29061233), 2024-03-10
Supplement: s1 [file s1]

# Selectivity Studies and Free Energy Calculations of AKT Inhibitors

Haizhen A. Zhong\* and David Goodwin

Department of Chemistry, University of Nebraska at Omaha, Omaha, Nebraska 68182, United States

\* Correspondence: hzhong@unomaha.edu; Tel.: (1) (402) 554-3145

**Figure S1.** Multiple sequence alignments of three different AKT subtypes. The alignment was generated with the Clustal Omega program. AKT1: 6S9W; AKT2: 3D0E and AKT2\_Comb; AKT3: AAD24196.1. Binding residues unique to different subtypes are highlighted.

**Figure S2.** The Ramachandran plot for the AKT3\_HM model (A) and the AKT3\_AF model (B).

**Table S1.** Docking CovDock scores (Kcal/mol), the MT-based free energy ( $\Delta G$ , Kcal/mol) and the interacting residues for the AKT1 binding (6S9W and 6S9W\_L models) based on the  $IC_{50}$  (nM) values of tested compounds.

**Figure S3.** Superposition of AKT1 (red), AKT2 (cyan) and AKT3 (orange). The catalytic domain and the PH domain were highlighted.

**Table S2.** Interacting residues from the CovDock generated poses for the AKT1 (6S9W) models.

**Table S3.** Interacting residues from the CovDock generated poses for the AKT2 (3D0E\_N and 3D0E) models.

**Table S4.** Interacting residues from the CovDock generated poses for the AKT3 model (HM model and AF model).

**Figure S4.** Interacting residues of AKT3 inhibitors (the AF model).

CLUSTAL 2.1 multiple sequence alignment

```

6S9W (AKT1)      GSDVAIVKEGWLHKGREYIKTWPRPYFLLKNDGTFIGYKERPDQVDQREAPLNNFSVAQC 60
AAD24196.1      MSDVTIVKEGWVQKRGEYIKNWRPRYFLLKTDGSFIGYKEKPQDQVDLP-YPLNFSVAKC 59
3D0E (AKT2)      ----- 0
AKT2_Comb       MNEVSVIKEGWLHKGREYIKTWPRPYFLLKSDGSFIGYKERPEAPDQTLPLNFSVAEC 60
                  E17 (AKT3)                                N54 (AKT1/2)
                  N53 (AKT3)

6S9W (AKT1)      QLMKTERPRPNTFIIIRCLQWTTVIERTFHVETPEEREETTAIQTVADGLKKQAAAE--M 118
AAD24196.1      QLMKTERPKPNTFIIIRCLQWTTVIERTFHVDTPEEREETTAIQAVADRLQRQEE---E 115
3D0E (AKT2)      ----- 0
AKT2_Comb       QLMKTERPRPNTFVIRCLQWTTVIERTTFHVDSPDEREETWMRAIQMVANSLKQRAPGEDPM 120
                  W80 (AKT1)
                  W79 (AKT3)
                  R86 (AKT2)

6S9W (AKT1)      DFRSGSP--SDNSGAEEMEVSLAKPKHRVTMNEFEYLKLLGKGTFGKVILVKEKATGRYY 176
AAD24196.1      RMNCSPSQIDNIGEEEMDA-STTHHKRKTMNDFDYLLGKGTFGKVILVREKASGKYY 174
3D0E (AKT2)      -----KVTMNDFDYLLGKGTFGKVILVREKATGRYY 33
AKT2_Comb       DYKCGSPSD--SSTTEEMEVAVSKARAKVTMNDFDYLLGKGTFGKVILVREKATGRYY 178
                  :  ***:***:*****:***:***:
                  T162, F163 (AKT2)

6S9W (AKT1)      AMKILKKEVIVAKDEVAHTLTENRVLQNSRHPFLTALKYSFQTHDRLCFVMEYANGGELF 236
AAD24196.1      AMKILKKEVIAKDEVAHTLTESRVLKNTRHPFLTSLKYSFQTKDRLCFVMEYVNGGELF 234
3D0E (AKT2)      AMKILRKEVIAKDEVAHTVTESRVLQNTRHPFLTALKYAFQTHDRLCFVMEYANGGELF 93
AKT2_Comb       AMKILRKEVIAKDEVAHTVTESRVLQNTRHPFLTALKYAFQTHDRLCFVMEYANGGELF 238
                  *****:***:***:*****:***:***:*****:***:***:*****:*****
                  D188, H192, R198 (AKT3)
                  K181                K191 E193 (AKT2)

6S9W (AKT1)      FHLSRERVFSEDRARFYGAEIVSALDYLHSEKNVVYRDLKLENLMLDKDGHIKITDFGLC 296
AAD24196.1      FHLSRERVFSEDRTRFYGAEIVSALDYLHSG-KIVYRDLKLENLMLDKDGHIKITDFGLC 293
3D0E (AKT2)      FHLSRERVFTEERARFYGAEIVSALEYLHSR-DVVYRDIKLENLMLDKDGHIKITDFGLC 152
AKT2_Comb       FHLSRERVFTEERARFYGAEIVSALEYLHSR-DVVYRDIKLENLMLDKDGHIKITDFGLC 297
                  *****:***:***:*****:***:***:*****:*****:*****
                  (AKT1)                Y272, R273, D274                D292 C296
                  (AKT2)                K277, E279, N280                D293
                  (AKT3)                R270, D271

6S9W (AKT1)      KEGIKDGATMKTFCGTPEYLAPEVLEDNDYGRAVDWWGLGVVMYEMMCGRLPFYNQDHEK 356
AAD24196.1      KEGITDAATMKTFCGTPEYLAPEVLEDNDYGRAVDWWGLGVVMYEMMCGRLPFYNQDHEK 353
3D0E (AKT2)      KEGISDGATMKTFCGTPEYLAPEVLEDNDYGRAVDWWGLGVVMYEMMCGRLPFYNQDHER 212
AKT2_Comb       KEGISDGATMKTFCGTPEYLAPEVLEDNDYGRAVDWWGLGVVMYEMMCGRLPFYNQDHER 357
                  *****:***:*****:*****:*****:*****:*****:*****
                  C310 (AKT1), C311 (AKT2)
                  K294, E295, F306, C307 (AKT3)

6S9W (AKT1)      LFELILMEEIRFPRTLGPEAKSLLSGLLKDPKQRLGGGSDAKEIMQHRRFFAGIVWQHV 416
AAD24196.1      LFELILMEDIKFPRTLSSDAKSLLSGLLIKDPNKRLGGGPDAKEIMRHSFFSGVNWQDV 413
3D0E (AKT2)      LFELILMEEIRFPRTLSPEAKSLLAGLLKDPKQRLGGGPDAKEVMEHRFFLSINWQDV 272
AKT2_Comb       LFELILMEEIRFPRTLSPEAKSLLAGLLKDPKQRLGGGPDAKEVMEHRFFLSINWQDV 417
                  *****:***:*****:*****:***:***:*****:***:***:***:

```

Reported sequence identity between sequences:

|                |        |        |        |        |
|----------------|--------|--------|--------|--------|
| 1: 6S9W (AKT1) | 100.00 | 82.31  | 88.74  | 83.30  |
| 2: AAD24196.1  | 82.31  | 100.00 | 83.28  | 78.79  |
| 3: 3D0E (AKT2) | 88.74  | 83.28  | 100.00 | 100.00 |
| 4: AKT2_Comb   | 83.30  | 78.79  | 100.00 | 100.00 |

**Figure S1.** Multiple sequence alignments of three different AKT subtypes. The alignment was generated with the Clustal Omega program. AKT1: 6S9W; AKT2: 3D0E and AKT2\_Comb; AKT3: AAD24196.1. Binding residues unique to different subtypes are highlighted.

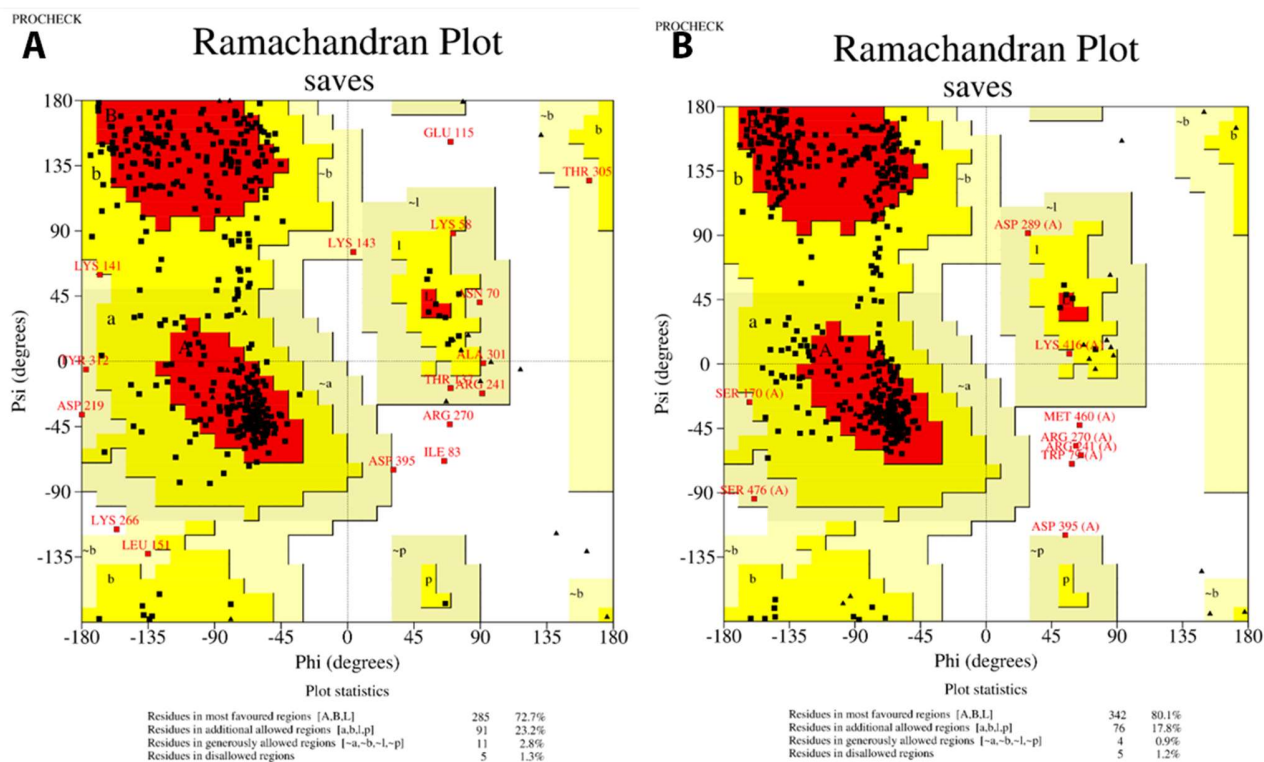

**Figure S2.** The Ramachandran plot for the AKT3\_HM model (A) and the AKT3\_AF model (B).

**Table S1.** Docking CovDock scores (Kcal/mol), the MT-based free energy ( $\Delta G$ , Kcal/mol) and the interacting residues for the AKT1 binding (6S9W and 6S9W\_L models) based on the IC<sub>50</sub> (nM) values of tested compounds.

| Compd. | IC <sub>50</sub><br>(nM) | $\Delta G_{exp}$ | 6S9W   | $\Delta\Delta G$<br>(6S9W) | 6S9W_L  | $\Delta\Delta G$<br>(6S9W_L) | MT1    | $\Delta\Delta G$<br>(MT,<br>6S9W) |
|--------|--------------------------|------------------|--------|----------------------------|---------|------------------------------|--------|-----------------------------------|
| 6      | 1                        | -12.28           | -12.94 | 0.66                       | -14.695 | 2.42                         | -14.62 | 2.34                              |
| 7      | 38                       | -10.12           | -11.88 | 1.76                       | -14.31  | 4.19                         | -12.75 | 2.63                              |
| 8      | 490                      | -8.61            | -13.85 | 5.25                       | -14.08  | 5.47                         | -14.24 | 5.63                              |
| 9      | 381                      | -8.76            | -14.12 | 5.36                       | -13.84  | 5.09                         | -15.66 | 6.90                              |
| 10     | 39                       | -10.11           | -11.71 | 1.61                       | -14.58  | 4.48                         | -13.10 | 3.00                              |
| 11     | 1140                     | -8.11            | -12.75 | 4.64                       | -14.58  | 6.48                         | -14.88 | 6.77                              |
| 12     | 813                      | -8.31            | -11.64 | 3.33                       | NA      |                              | -16.61 | 8.30                              |
| 13     | 53                       | -9.92            | -12.03 | 2.10                       | -15.56  | 5.64                         | -11.71 | 1.79                              |
| 14     | 1716                     | -7.86            | -12.76 | 4.89                       | -12.11  | 4.24                         | -15.00 | 7.14                              |
| 15     | 643                      | -8.45            | -12.49 | 4.04                       | -13.88  | 5.43                         | -12.34 | 3.89                              |
| 16     | 1281                     | -8.04            | -12.86 | 4.82                       | -12.19  | 4.15                         | -14.62 | 6.58                              |
| 17     | 98                       | -9.56            | -12.28 | 2.72                       | -9.99   | 0.43                         | -15.22 | 5.65                              |
| 18     | 527                      | -8.56            | -13.18 | 4.62                       | -14.18  | 5.61                         | -16.32 | 7.76                              |

|       |      |        |        |      |        |      |        |      |
|-------|------|--------|--------|------|--------|------|--------|------|
| 19    | 604  | -8.48  | -13.17 | 4.68 | -14.54 | 6.05 | -15.41 | 6.93 |
| 20    | 9484 | -6.85  | -12.90 | 6.05 | -12.67 | 5.82 | -15.40 | 8.55 |
| 21    | 2853 | -7.56  | -12.00 | 4.44 | -13.27 | 5.70 | -17.15 | 9.59 |
| 22    | 91   | -9.60  | -12.65 | 3.04 | -7.65  | 1.95 | -16.64 | 7.04 |
| 23    | 1797 | -7.84  | -12.94 | 5.10 | -12.49 | 4.65 | -15.32 | 7.48 |
| 24    | 22   | -10.45 | -10.82 | 0.37 | -15.47 | 5.02 | -12.63 | 2.18 |
| 25    | 1631 | -7.89  | -11.02 | 3.13 | -9.47  | 1.57 | -13.81 | 5.91 |
| 26    | 2111 | -7.74  | -13.07 | 5.32 | -11.81 | 4.07 | -15.81 | 8.07 |
| 27    | 209  | -9.11  | -12.11 | 3.00 | -9.13  | 0.02 | -16.11 | 7.00 |
| 28    | 130  | -9.39  | -11.22 | 1.82 | -12.18 | 2.79 | -15.62 | 6.23 |
| 29    | 186  | -9.18  | -11.71 | 2.53 | -15.91 | 6.73 | -13.39 | 4.20 |
| 30    | 44   | -10.04 | -11.90 | 1.87 | -15.30 | 5.27 | -14.52 | 4.48 |
| 31    | 35   | -10.17 | -11.44 | 1.27 | -14.56 | 4.38 | -13.24 | 3.07 |
| 32    | 112  | -9.48  | -11.66 | 2.18 | -14.38 | 4.90 | -14.34 | 4.86 |
| 33    | 7087 | -7.02  | -12.55 | 5.53 | -13.78 | 6.75 | -13.67 | 6.65 |
| 34    | 4566 | -7.28  | -12.15 | 4.87 | -13.94 | 6.66 | -16.56 | 9.27 |
| 35    | 5930 | -7.13  | -12.92 | 5.79 | -13.30 | 6.17 | -13.98 | 6.85 |
| mean  |      |        |        | 3.56 |        | 4.56 |        | 5.89 |
| stdev |      |        |        | 1.66 |        | 1.81 |        | 2.18 |

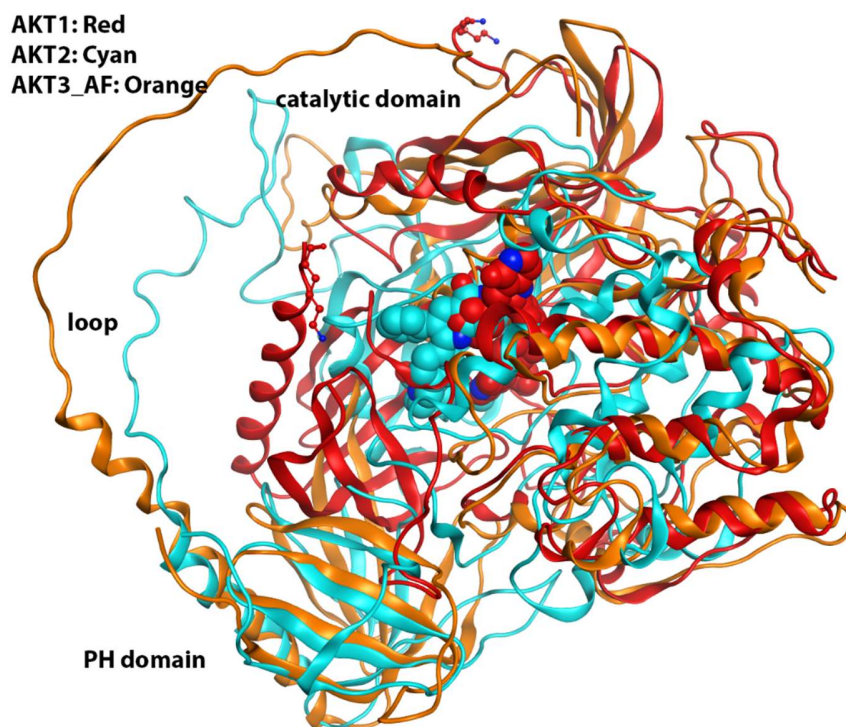

**Figure S3.** Superposition of AKT1 (red), AKT2 (cyan) and AKT3 (orange) and the catalytic domain and the PH domain of the AKT proteins.

**Table S2.** Interacting residues from the CovDock generated poses for the AKT1 (6S9W) models.

| Compd. | Interacting residues (6S9W)                       | Compd. | Interacting residues (6S9W)           |
|--------|---------------------------------------------------|--------|---------------------------------------|
| 6      | N54, W80, Y272, D292                              | 21     | E17, Q79, W80, N204, E267, Y272, D274 |
| 7      | N54, W80, Y263, Y272, D274, D292                  | 22     | N54, A58, Q59, W80, Y272, D292        |
| 8      | N54, W80, Y272                                    | 23     | E17, Q79, W80, Y272, R273, D274       |
| 9      | N53, N54, W80, Y263, Y272, D292, L295             | 24     | N54, W80, Y272, D292                  |
| 10     | N54, W80, Y272, D292                              | 25     | E17, Q79, Y272, R273, D274, E267      |
| 11     | E17, Q79, W80, Y272, R273, D274, C310             | 26     | N54, W80, Y272, D274, D292            |
| 12     | E17, Q79, Y272, R273, D274, K297, C310            | 27     | N54, W80, Y272, D292, L295, K297      |
| 13     | N54, W80, Y272, D292                              | 28     | N54, W80, Y272, R273, C310            |
| 14     | E17, Q79, Y272, R273, D274, C310                  | 29     | N54, W80, Y272, D292                  |
| 15     | E17, N54, Q79, Y272, R273, D274                   | 30     | N54, W80, Y272, D292                  |
| 16     | E17, Q79, Y263, Y272, R273, D274, C310            | 31     | N54, W80, Y272, D274                  |
| 17     | N54, W80, Y272, D274, D292                        | 32     | N54, W80, Y272                        |
| 18     | N54, W80, E267, Y272                              | 33     | E17, Q79, Y272, R273, D274            |
| 19     | N54, W80, Y272, D274, D292                        | 34     | N54, W80, Y272, C310                  |
| 20     | E17, A58, W80, R200, E267, Y272, R273, D274, C310 | 35     | N54, W80, T82, Y272, D292             |

**Table S3.** Interacting residues from the CovDock generated poses for the AKT2 (3D0E\_N and 3D0E) models.

| Compd. | Interacting residues (3D0E_N) | Interacting residues (3D0E)        |
|--------|-------------------------------|------------------------------------|
| 6      | F163, K191, E279, D293        | F163, K181, E230, A232, E279, D293 |
| 7      | F163, K277, E279, D293        | F163, K181, T197, E279, D293       |
| 10     | E279                          | F163, K181, E279, D293             |
| 11     | F163, E279, K277, D293        | F163, E279, D293, K181             |
| 12     | E279                          | F163, D293                         |
| 13     | E279                          | F163, K181, E279, D293             |
| 14     | F163, K277, D293              | F163, E279                         |
| 15     | F163, K191, E193, E279        | F163, K181, T197, E279, D293       |
| 16     | E193, A232, E279              | F163, K181, T197, A232, E279, D293 |
| 17     | R15, K277, N280               | F238, E279, F443                   |
| 18     | E193, E279, A232              | F163, K181, E279, D293             |
| 19     | F163, T162, E279, F238        | F163, E279, D293                   |
| 20     | F163, E230, E279, D293        | F163, E279                         |
| 21     | T162, F238, E279              | F238, E279, F443                   |
| 22     | T213, E279                    | F238, E279, F443                   |
| 23     | F163, E230, E279              | E193, K277, L278                   |
| 24     | F163, N280, E279, D293        | F163, K181, E279, D293             |
| 25     | F163, T213, F238, E279, K277  | F238, E279, D293                   |
| 26     | F163, T162, E279              | F238, E279, T313, F443             |
| 27     | E279                          | F238, E279, F443                   |
| 28     | R86, F163, D293               | F238, E279, F443                   |
| 29     | E279, E193, T213              | F163, K181, A232, E279, D293       |
| 30     | E279, E193                    | F163, E279, D293, G312             |
| 31     | F163, T162, D293              | F163, K181, A232, D293             |
| 32     | F163, T162, E279, D293        | F163, K181, T197, E279, D293, F443 |
| 33     | F163, E193, E230, E279        | F163, K181, E279, D293             |
| 34     | F163, T162, F238              | F238, E279, F443                   |
| 35     | F163, K191, E236, E279, D293  | F163, E279                         |

Note: the reduced number of protein-ligand interactions in the AKT2 model was since ligands with >20,000 nM were removed from further analysis.

**Table S4.** Interacting residues from the CovDock generated poses for the AKT3 AF model.

| Compd. | Interacting residues (AF) | Compd | Interacting residues (AF) |
|--------|---------------------------|-------|---------------------------|
|--------|---------------------------|-------|---------------------------|

|           |                             |           |                                         |
|-----------|-----------------------------|-----------|-----------------------------------------|
| <b>6</b>  | W79, K294, D188, H192, F306 | <b>22</b> | W79, F306                               |
| <b>11</b> | E17, W79                    | <b>23</b> | G308                                    |
| <b>12</b> | E17, W79, E295              | <b>24</b> | W79, E17                                |
| <b>13</b> | W79, H192, R198, K294, F306 | <b>25</b> | E17, T195, E295                         |
| <b>14</b> | W79, T195, R270, F306       | <b>26</b> | W79, E295                               |
| <b>15</b> | E17                         | <b>27</b> | W79, T195, R270, F306, G308             |
| <b>16</b> | W79, E295, G308             | <b>28</b> | NA                                      |
| <b>17</b> | W79, F306                   | <b>30</b> | W79, H192 , R198                        |
| <b>18</b> | E295                        | <b>31</b> | W79, H192, Q470                         |
| <b>19</b> | E17, W79, E295              | <b>32</b> | W79, H192, E295, K294, D188             |
| <b>20</b> | E295, G308                  | <b>35</b> | W79, K294, E295, H192, R198, D188, F306 |
| <b>21</b> | W79, F306                   |           |                                         |

Note: the reduced number of protein-ligand interactions in the AKT3 model was since ligands with >20,000 nM were removed from further analysis.

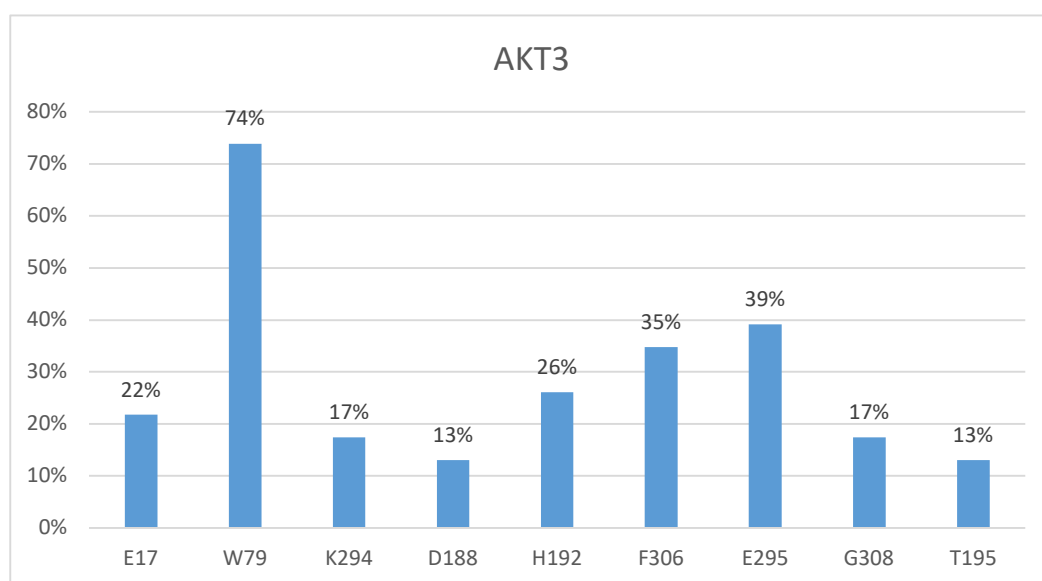

**Figure S4.** Interacting residues of AKT3 inhibitors (the AF model).
